# Supplementary material for: Nutritional Status as a Predictive Biomarker for Immunotherapy Outcomes in Advanced Head and Neck Cancer
Source: MDPI journal article supplement (doi:10.3390/cancers13225772), 2021-11-18
Supplement: s1 [file s1]

Supplementary Materials

# Nutritional Status as a Predictive Biomarker for Immunotherapy Outcomes in Advanced Head and Neck Cancer

**Table S1.** Correlation between age, baseline PNI, and pretreatment BMI trend

|                                         | Pearson's r | <i>p</i> value |
|-----------------------------------------|-------------|----------------|
| <b>Characteristic</b>                   |             |                |
| Age vs. baseline PNI                    | -0.0086     | 0.93           |
| Age vs. pretreatment BMI trend          | -0.23       | <b>0.05</b>    |
| Baseline PNI vs. pretreatment BMI trend | -0.15       | 0.19           |

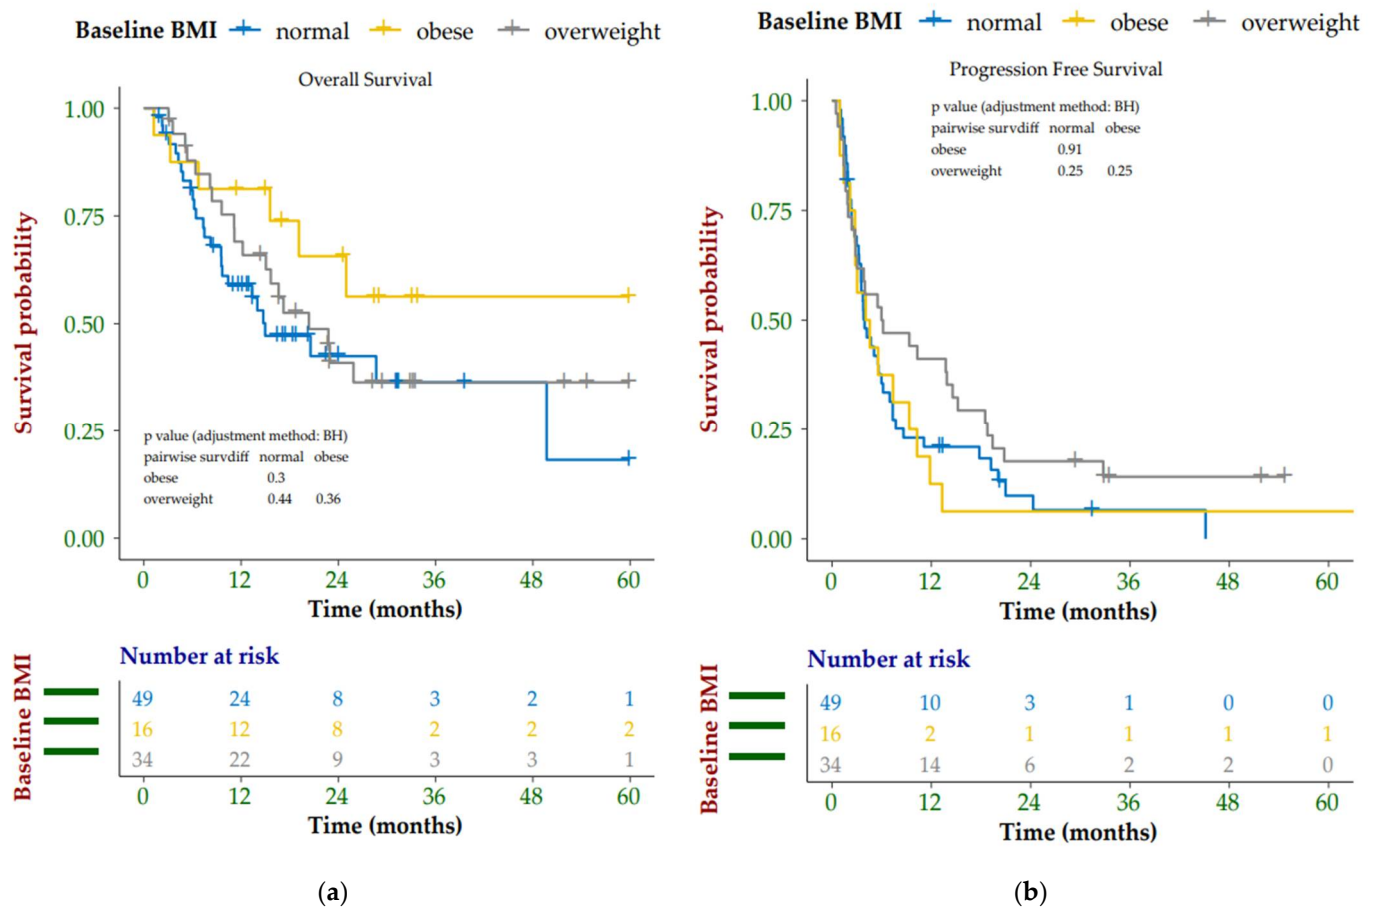

**Figure S1.** Kaplan-Meier survival curves displaying (a) OS according to baseline BMI group; (b) PFS by baseline BMI group

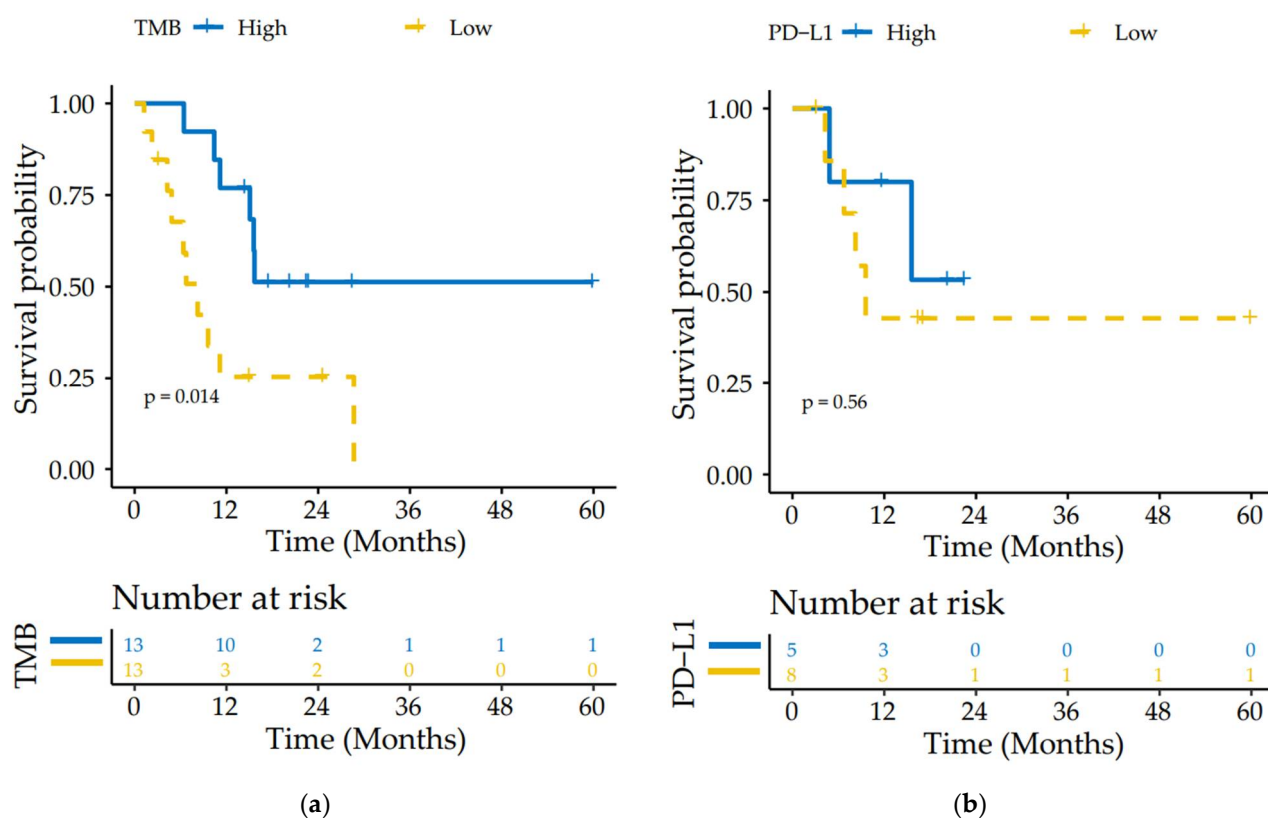

**Figure S2.** Kaplan-Meier survival curves displaying (a) OS according to TMB group; (b) OS according to PD-L1 group
